# Supplementary material
Source: publisher figshare collection journal article supplement (https://frontiersin.figshare.com/ndownloader/files/22302600)

**SUPPLEMENTARY FIGURE S2 | *PfAvr3* candidate PF009\_g26276 is differentially expressed in *Phytophthora fragariae* UK-1-2-3 isolates.**

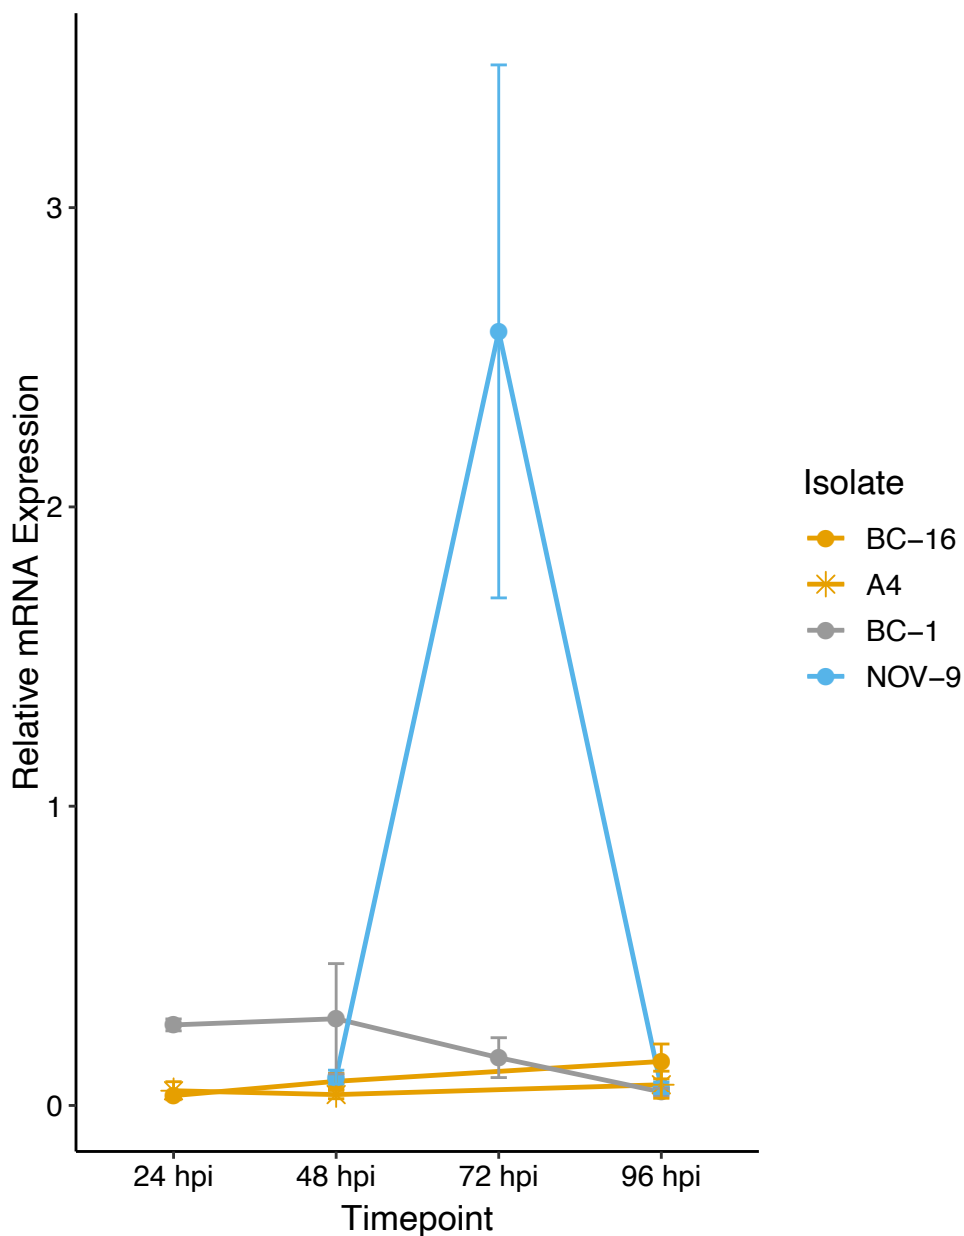

Supplement: Supplementary file [file 22302600]
